# Supplementary material
Source: Springer Nature journal article supplement (https://www.springermedizin.de/resource/supplementary/13633_2012_55_MOESM4_ESM.pdf/9595588)

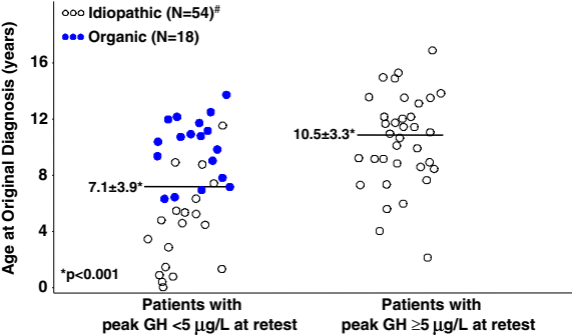

Supplement: MOESM4 [file 9595588]
